# Supplementary material for: Elucidating the electrochemical reaction mechanism of lithium-rich antiperovskite cathodes for lithium-ion batteries as exemplified by (Li2Fe)SeO
Source: Royal Society of Chemistry journal article supplement (doi:10.1039/d3ta00552f), 2023-01-01
Supplement: d3ta00552f1.pdf [file d3ta00552f1.pdf]

# Elucidating the electrochemical reaction mechanism of lithium-rich antiperovskite cathodes for lithium-ion batteries as exemplified by $(\text{Li}_2\text{Fe})\text{SeO}$ .

Lennart Singer<sup>a,\*\*</sup>, M.A.A. Mohamed<sup>b,d,\*\*</sup>, Henrik Hahn<sup>a</sup>, Ignacio G. Gonzalez-Martinez<sup>b</sup>, Martin Hantusch<sup>b</sup>, Karolina Wenelska<sup>c</sup>, Ewa Mijowska<sup>c</sup>, Bernd Büchner<sup>b</sup>, Silke Hampel<sup>b</sup>, Nico Gräßler<sup>b,\*</sup>, Rüdiger Klingeler<sup>a,\*</sup>

<sup>a</sup>*Kirchhoff Institute for Physics, Heidelberg University, 69120 Heidelberg, Germany*

<sup>b</sup>*Leibniz Institute for Solid State and Materials Research Dresden e.V., 01069 Dresden, Germany*

<sup>c</sup>*Nanomaterials Physicochemistry Department, Faculty of Chemical Technology and Engineering, West Pomeranian University of Technology, 71-065 Szczecin, Poland*

<sup>d</sup>*Department of Physics, Faculty of Science, Sohag University, 82524 Sohag, Egypt*

---

\*Corresponding authors.

\*\*Both authors contributed equally.

Email addresses: [n.graessler@ifw-dresden.de](mailto:n.graessler@ifw-dresden.de) (Nico Gräßler),  
[klingeler@kip.uni.heidelberg.de](mailto:klingeler@kip.uni.heidelberg.de) (Rüdiger Klingeler)

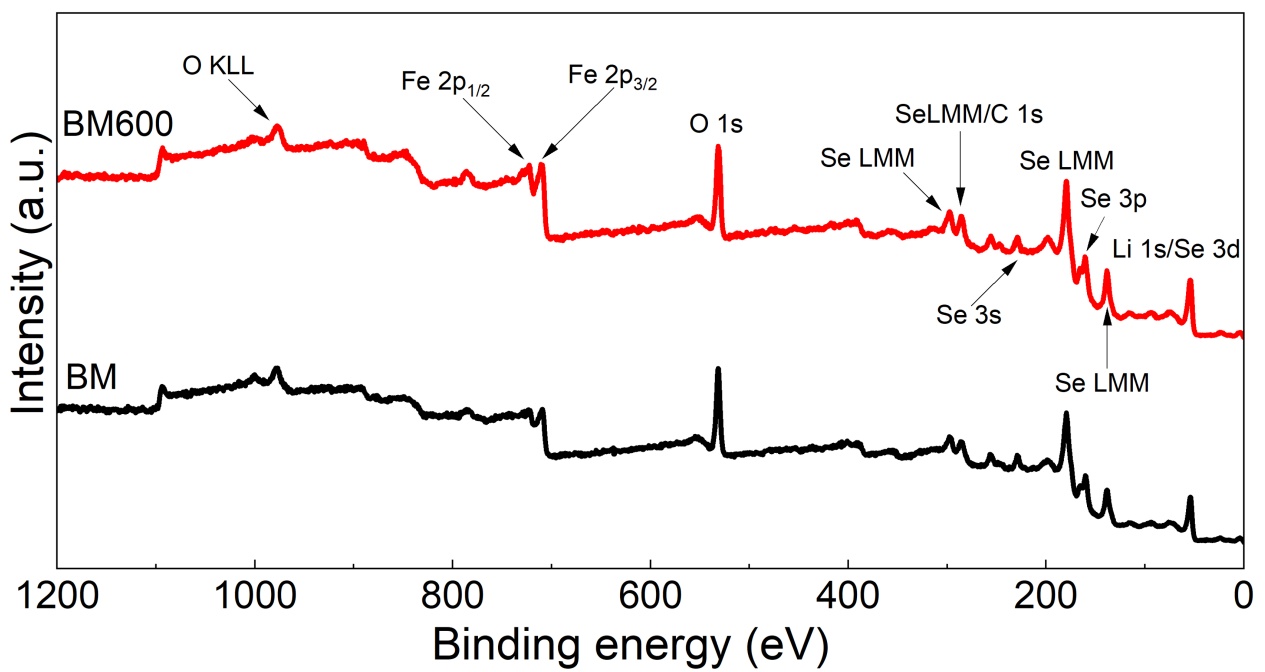

Figure S1 Full XPS spectra of (Li<sub>2</sub>Fe)SeO-BM and (Li<sub>2</sub>Fe)SeO-BM600

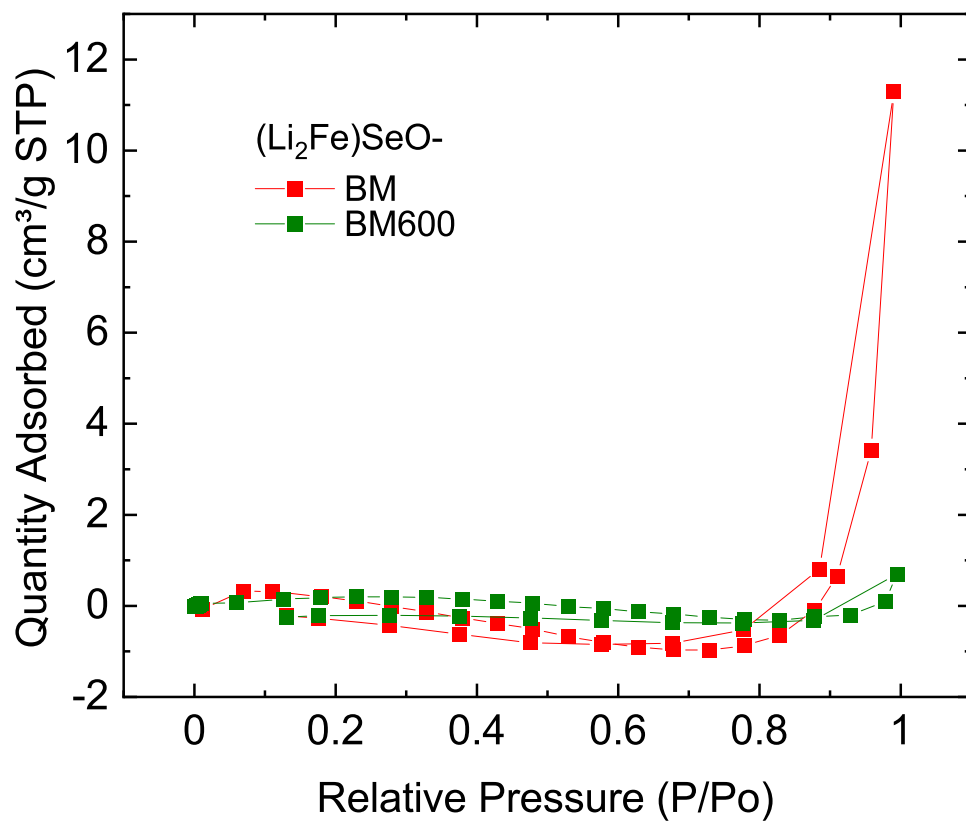

Figure S2 Nitrogen adsorption/desorption isotherms of (Li<sub>2</sub>Fe)SeO-BM and (Li<sub>2</sub>Fe)SeO-BM600.

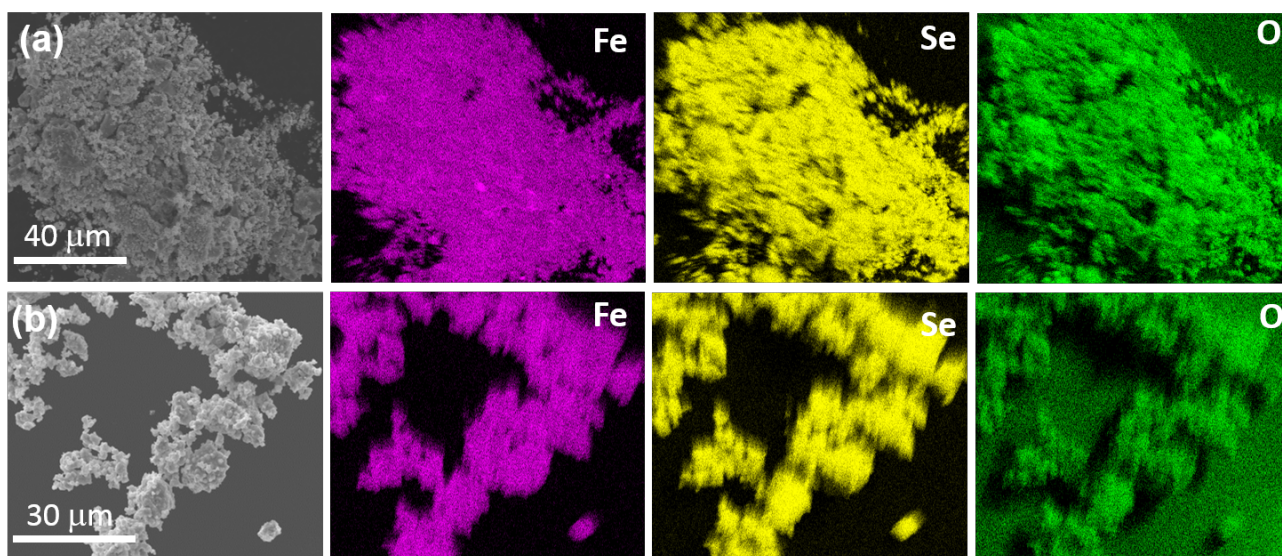

**Figure S3** EDS mapping of iron, selenium and oxygen for  $(\text{Li}_2\text{Fe})\text{SeO-BM}$  (a) and  $(\text{Li}_2\text{Fe})\text{SeO-BM600}$  (b). The two materials both possess a uniform distribution of the investigated elements.

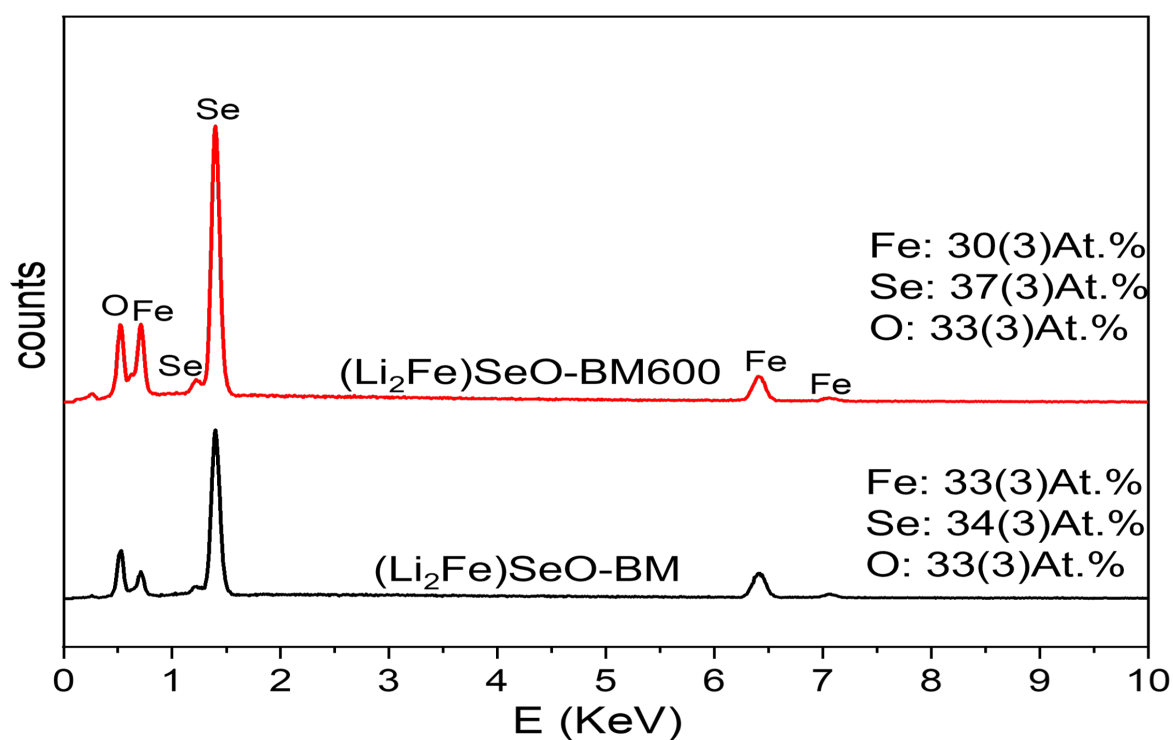

**Figure S4** EDS spectra of  $(\text{Li}_2\text{Fe})\text{SeO-BM}$  and  $(\text{Li}_2\text{Fe})\text{SeO-BM600}$  together with the atomic percent ratio of the existing elements. The results confirm within uncertainty the expected nominal composition of the materials.

**Table S1** ICP-OES results for (Li<sub>2</sub>Fe)SeO-BM and (Li<sub>2</sub>Fe)SeO-BM600

| compound                      | Mass %    |             |            | Molar ratios <sup>1</sup> |             |             |             |
|-------------------------------|-----------|-------------|------------|---------------------------|-------------|-------------|-------------|
|                               | Li        | Fe          | Se         | Li                        | Fe          | Se          | O           |
| (Li <sub>2</sub> Fe)SeO-BM    | 8.36±0.13 | 33.92 ±0.49 | 47.87±0.55 | 1.971±0.031               | 0.994±0.014 | 0.992±0.011 | 1.043±0.003 |
| (Li <sub>2</sub> Fe)SeO-BM600 | 8.34±0.08 | 33.81±0.28  | 47.49±0.49 | 1.996±0.019               | 1.006±0.008 | 0.999±0.01  | 0.999±0.007 |

<sup>1</sup>Molar ratios are scaled to sum up to about 5

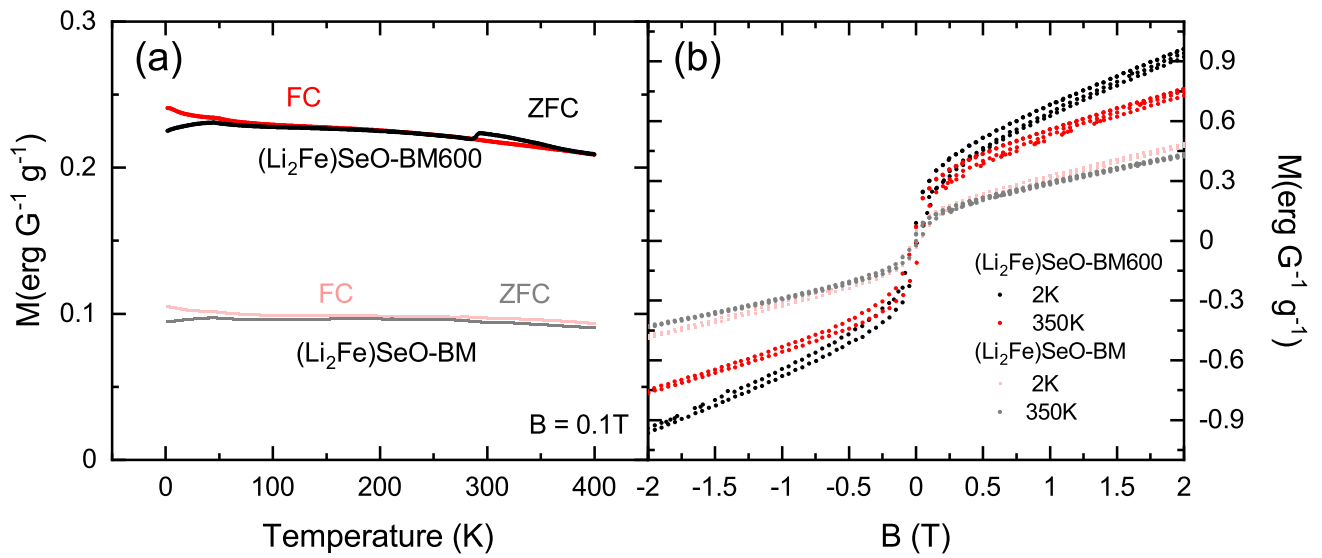

**Figure S5** Magnetization of  $(\text{Li}_2\text{Fe})\text{SeO}$  vs. temperature at  $B = 0.1 \text{ T}$  (a), and vs. magnetic field at  $T = 2 \text{ K}$  (b). The data indicate a antiferromagnetic transition at  $(T_N \simeq 290 \text{ K})$  and a ferri or ferromagnetic transition at 50 K. Hinting to the existence of  $\beta\text{-Fe}_{1-x}\text{Se}$  with  $x \approx 0.26$  and with  $x \approx 0.21 - 0.29$  as impurity phase present [1, 2, 3].

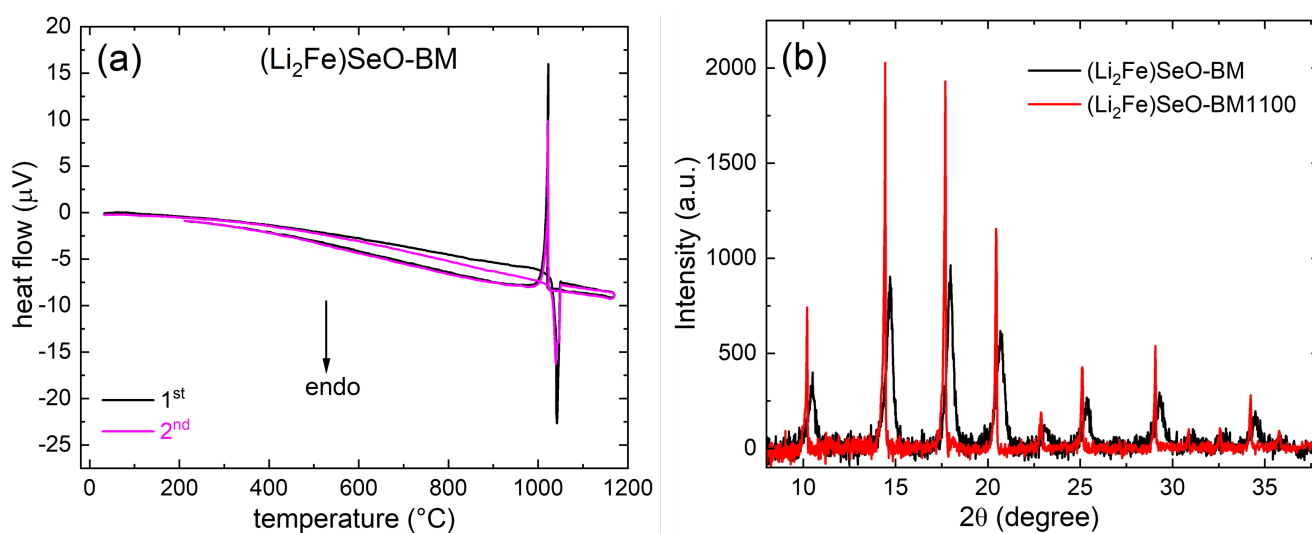

**Figure S6** DTA for  $(\text{Li}_2\text{Fe})\text{SeO-BM}$  (a) and XRD patterns (b) for pristine  $(\text{Li}_2\text{Fe})\text{SeO-BM}$  and after its heat treatment at 1100  $^\circ\text{C}$  ( $(\text{Li}_2\text{Fe})\text{SeO-BM1100}$ ). To prove that no phase decomposition occurs, the  $(\text{Li}_2\text{Fe})\text{SeO-BM}$  was heat-treated at 1100  $^\circ\text{C}$  (higher than its melting point) and then cooled normally to room temperature (we refer to this sample as  $(\text{Li}_2\text{Fe})\text{SeO-BM1100}$ ). The XRD patterns using Mo  $K_{\alpha 1}$  radiation source ( $\lambda = 0.709300 \text{ \AA}$ ) show that by heating the sample above its melting point, the peaks increase in intensity and becomes sharper. This effect can be attributed to an improvement of crystallinity and long-range atomic order. In addition, a noticeable shift in the peaks position to lower  $2\theta$  angle is remarked, which corresponds to an expansion in the lattice parameter. The expansion of the lattice parameter may be attributed to strain relaxation and vanishing of the internal defects.

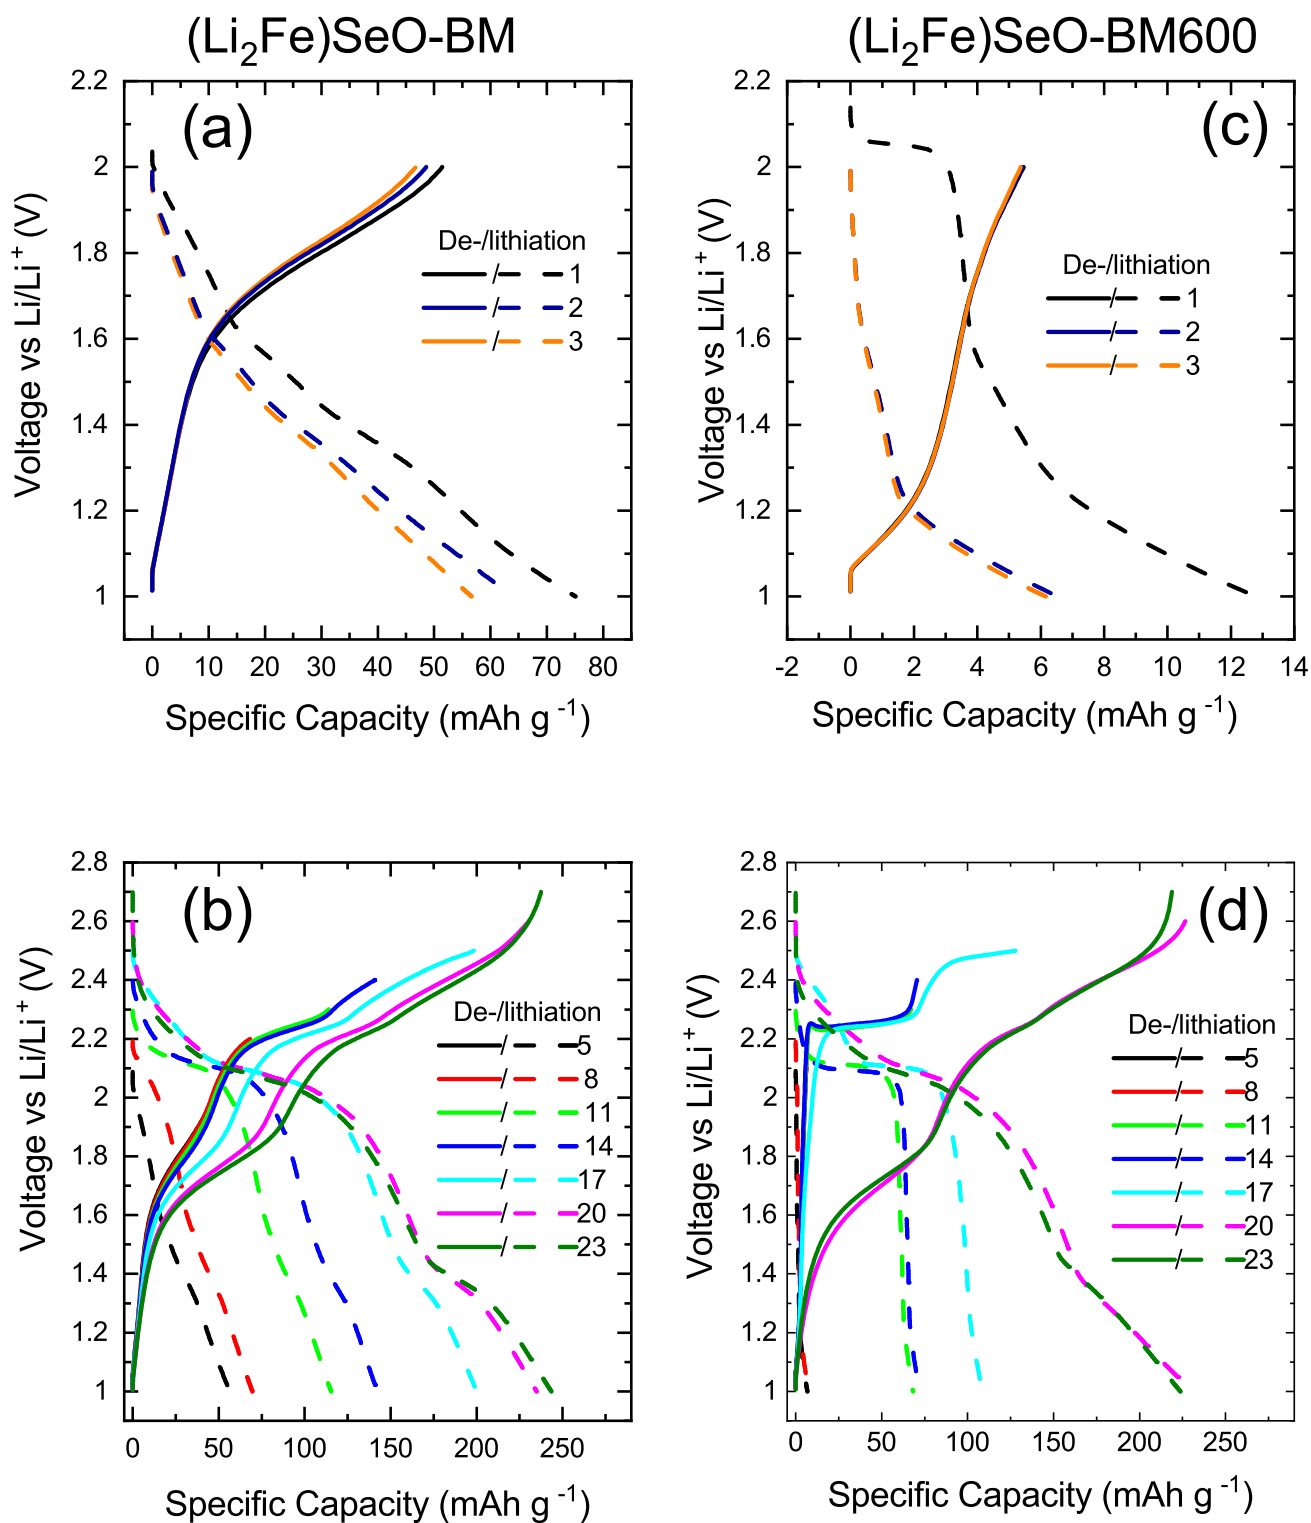

**Figure S7** Potential profiles of (Li<sub>2</sub>Fe)SeO-BM (a,b) and (Li<sub>2</sub>Fe)SeO-BM600 (c,d) in specific potential ranges at a C/10 current rate. At each potential step, 3 discharge/charge cycles were recorded. At direct discharge (Li<sub>2</sub>Fe)SeO-BM displays a pronounced capacity of around 75 mAh g<sup>-1</sup> whereas (Li<sub>2</sub>Fe)SeO-BM600 (c) shows a much lower capacity of around 12 mAh g<sup>-1</sup>. By increasing the potential range in 0.1 V steps (b,d) a decisive increase of the low voltage feature R3/O3 is for both samples only visible at 2.6 V, leading to a boundary voltage of 2.5 V.



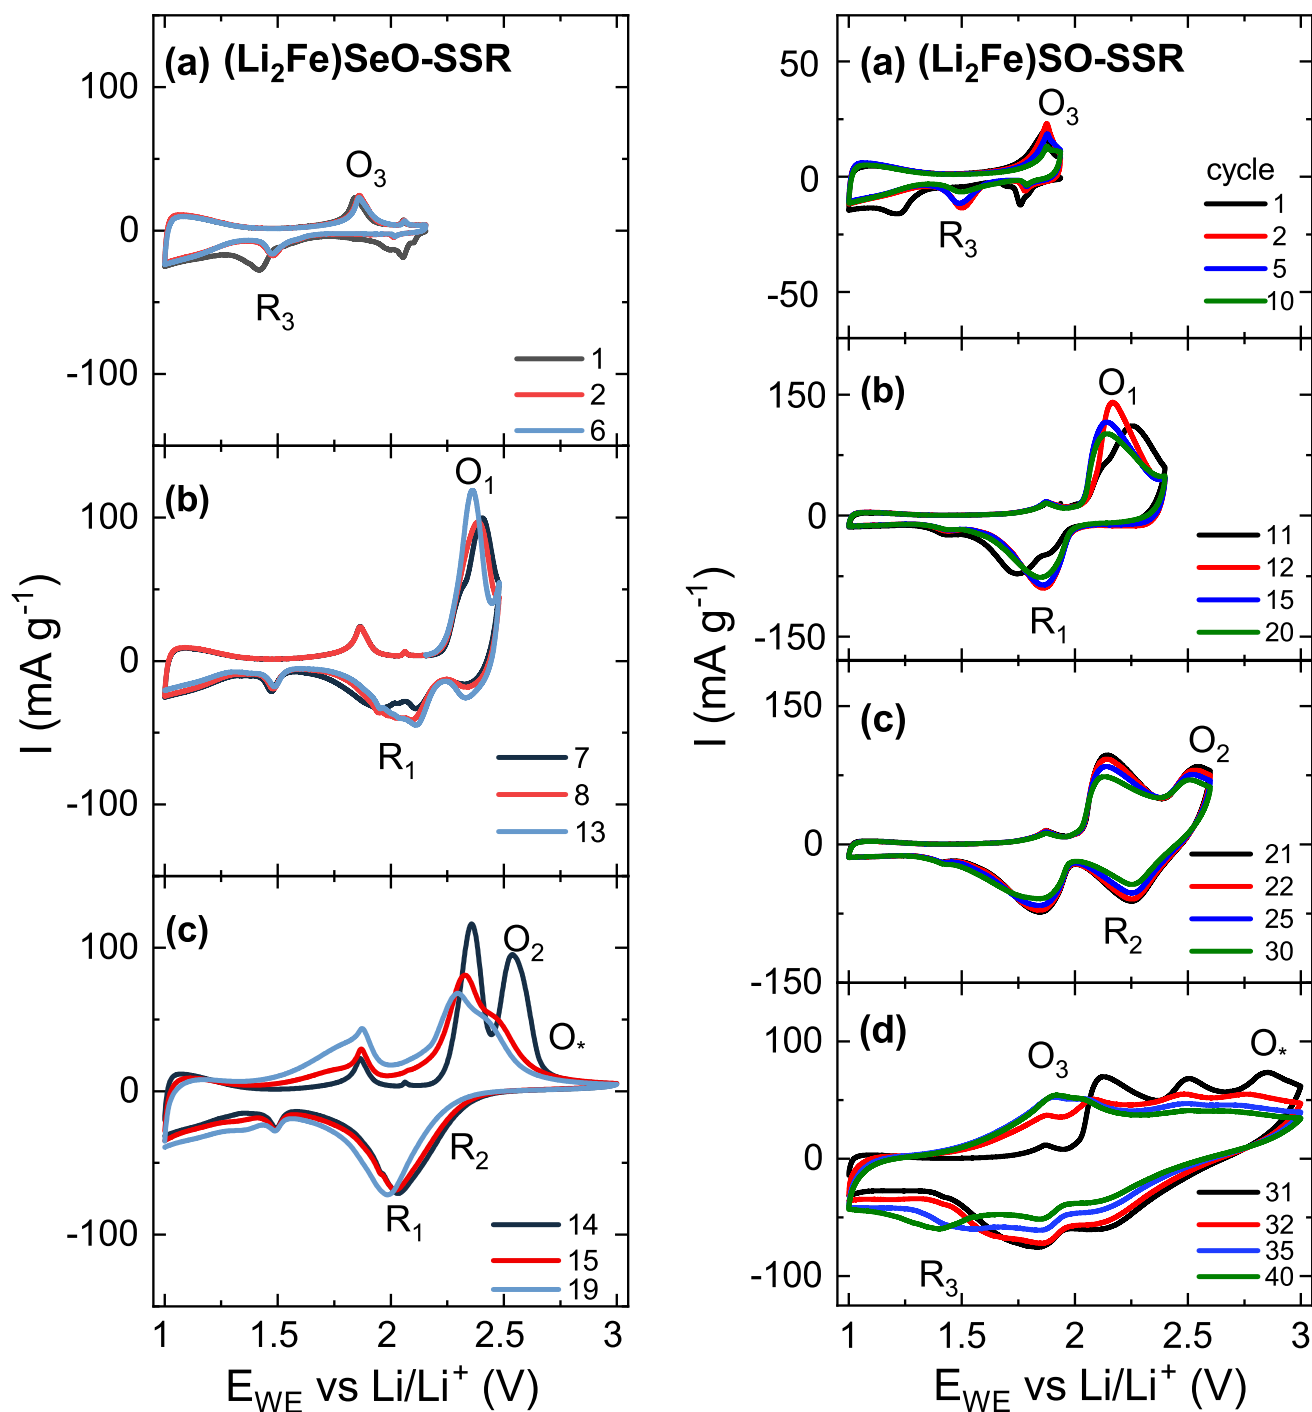

**Figure S8** Cyclic voltammograms of (left)  $(\text{Li}_2\text{Fe})\text{SeO-SSR}$  in the potential range from (a) 1 to OCV, (b) 1 to 2.4 V, (c) 1-3 V and (right)  $(\text{Li}_2\text{Fe})\text{SO-SSR}$  in the potential range from (a) 1 to OCV, (b) 1 to 2.4 V, (c) 1 to 2.6 V and (d) 1 to 3 V vs  $\text{Li}/\text{Li}^+$  measured at a scan rate of  $0.1 \text{ mV s}^{-1}$ . The cyclic voltammograms for both materials show, similar to the data shown for  $(\text{Li}_2\text{Fe})\text{SeO-BM}$  and  $\text{BM600}$  a pronounced increase in the low voltage  $\text{O}_3/\text{R}_3$  feature only after the voltage range was extended and include the high voltage process  $\text{O}^*$ . Note, the lower expression of  $\text{O}_3/\text{R}_3$  after the first cycle for the  $(\text{Li}_2\text{Fe})\text{SeO-SSR}$  samples compared to the ball-milled samples can likely be attributed to the much larger particles obtained through the SSR synthesis which reduces the number of active sites.

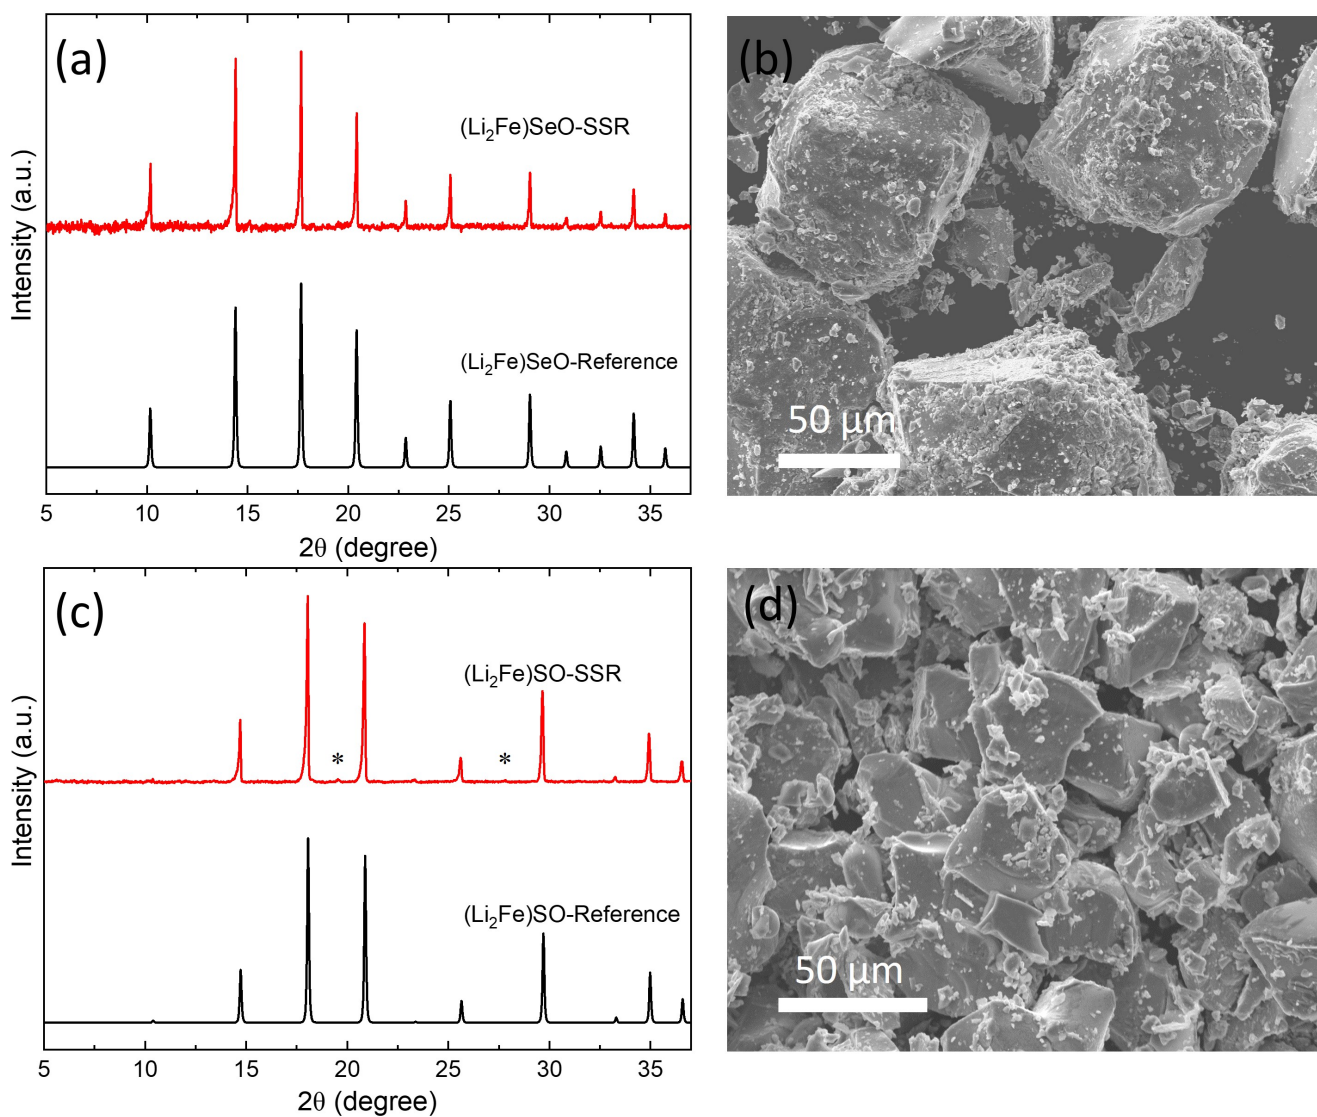

**Figure S9** XRD (using Mo  $K_{\alpha 1}$  radiation source ( $\lambda = 0.709300 \text{ \AA}$ )) and SEM image of  $(\text{Li}_2\text{Fe})\text{SeO}$  (a,b) and  $(\text{Li}_2\text{Fe})\text{SO}$  (c,d) prepared by solid-state reaction method. The synthesis was reproduced using the synthesis conditions from Ref.[4]. The asterisks in c refer to minor  $\text{LiFeO}_2$  secondary phase.

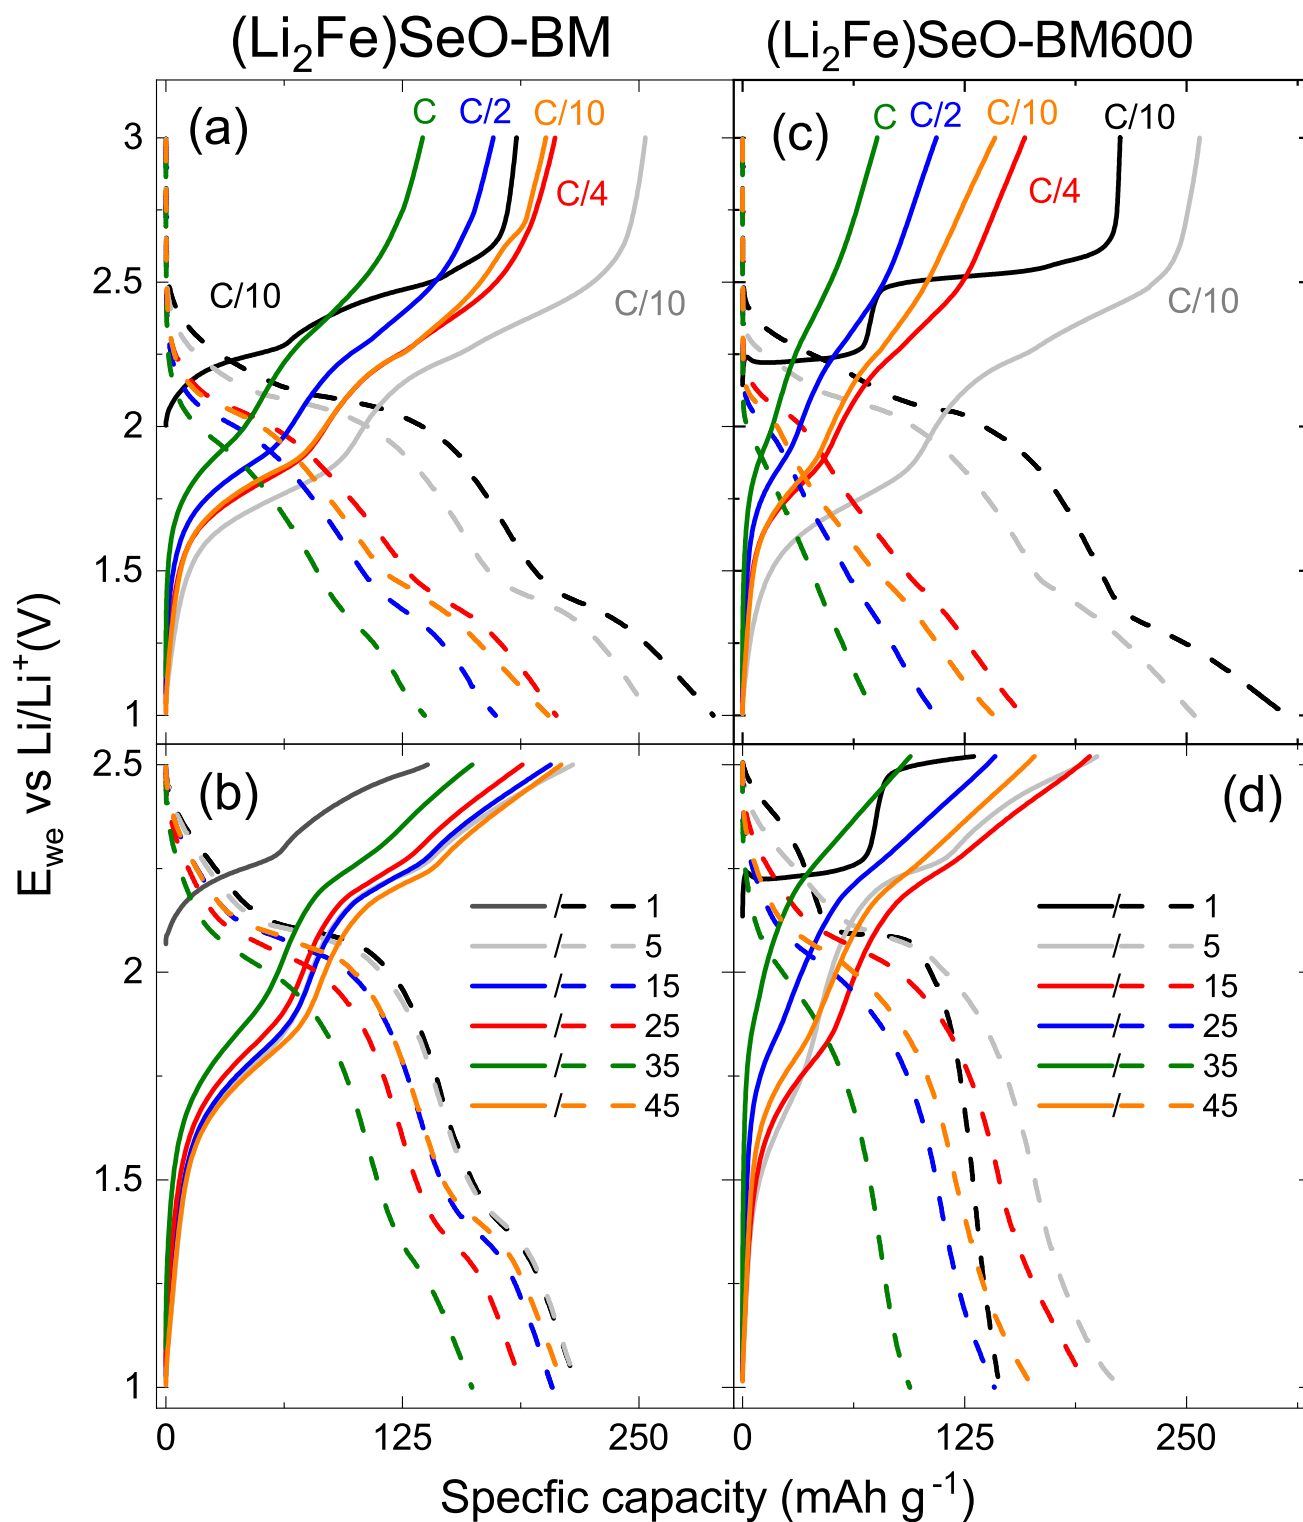

**Figure S10** Potential profiles of  $(\text{Li}_2\text{Fe})\text{SeO-BM}$  (a,b) and  $(\text{Li}_2\text{Fe})\text{SeO-BM600}$  (c,d) at different current rates of C/10, C/4, C/2 and C. The colors used symbolize distinct cycles and currents.

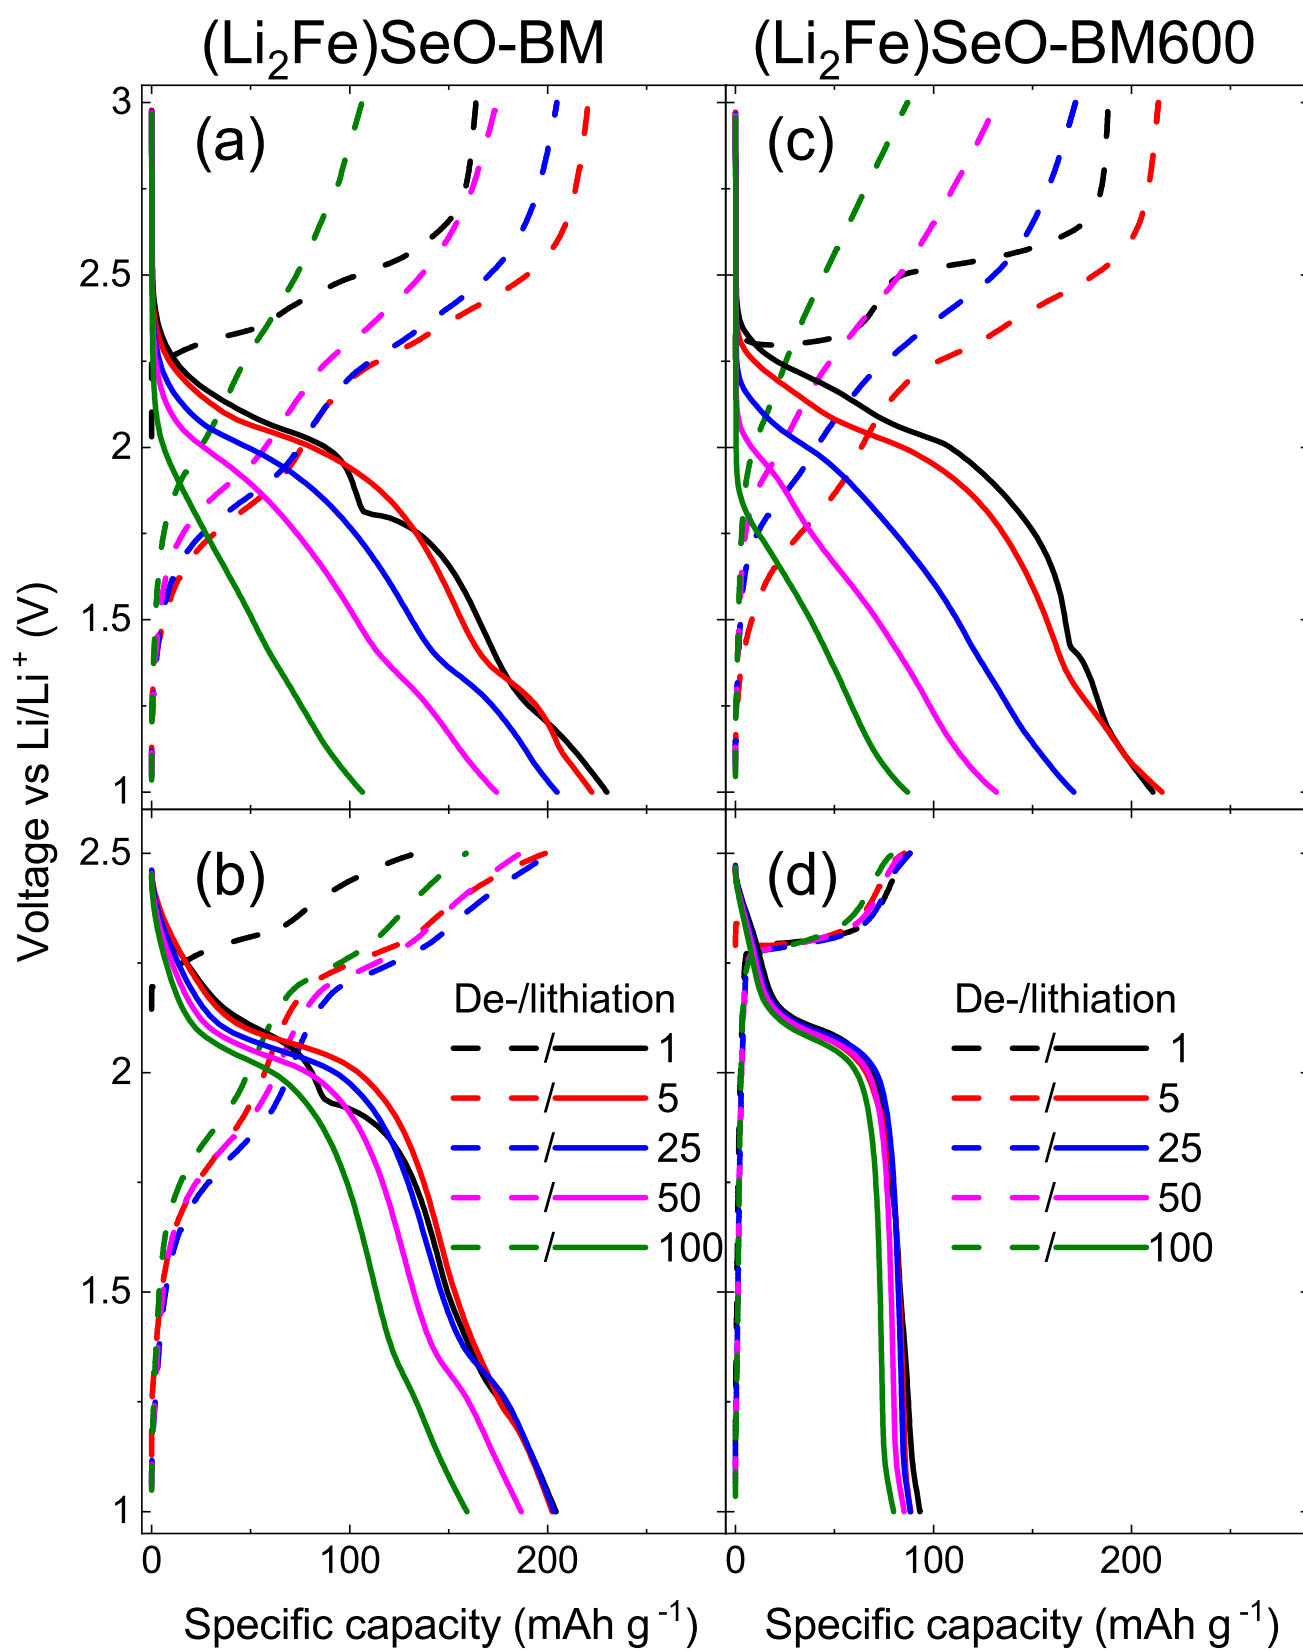

**Figure S11** Potential profiles of ( $\text{Li}_2\text{Fe}$ )SeO-BM (a,b) and ( $\text{Li}_2\text{Fe}$ )SeO-BM600 (c,d) at a current rate of 1 C. The colors used symbolize distinct cycles.

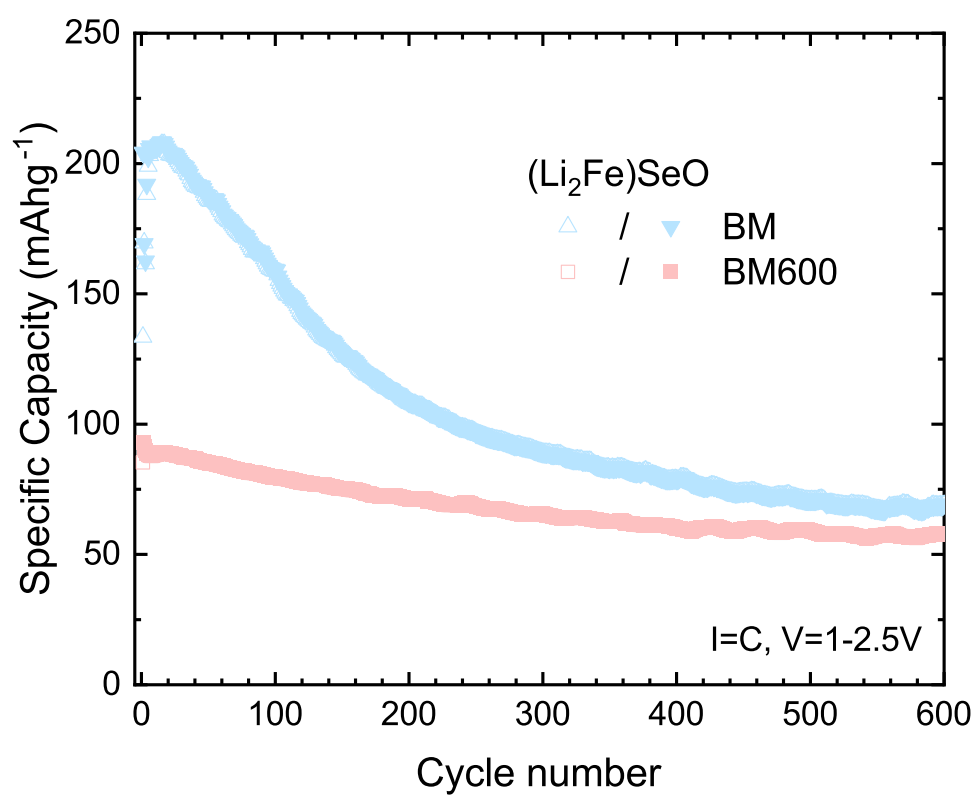

**Figure S12** Longterm GCPL of (Li<sub>2</sub>Fe)SeO-BM and (Li<sub>2</sub>Fe)SeO-BM600 in the limited potential range from 1 to 2.5 V at 1C.

## References

- [1] P. Terzieff and K. L. Komarek, *Monatshefte für Chemie*, 1978, **109**, 1037–1047.
- [2] T. Hirone, S. Maeda and N. Tsuya, *Journal of the Physical Society of Japan*, 1954, **9**, 496–499.
- [3] P. Terzieff and K. L. Komarek, *Monatshefte für Chemie*, 1978, **109**, 651–659.
- [4] K. T. Lai, I. Antonyshyn, Y. Prots and M. Valldor, *Journal of the American Chemical Society*, 2017, **139**, 9645–9649.
